# Supplementary material
Source: MDPI journal article supplement (https://www.mdpi.com/2071-1050/12/5/2071)

### Supplemental Material 1:

Network graph for aggregate stability within the top, second, third and fourth soil depths. MP = moldboard plow, CP = chisel plow, NT = no-till, PER = perennial system. Red color highlights the most evidence according the standard error of the direct effect estimate (aggregated over all studies including the respective two treatments), which is this case is given for comparison NT versus MP.

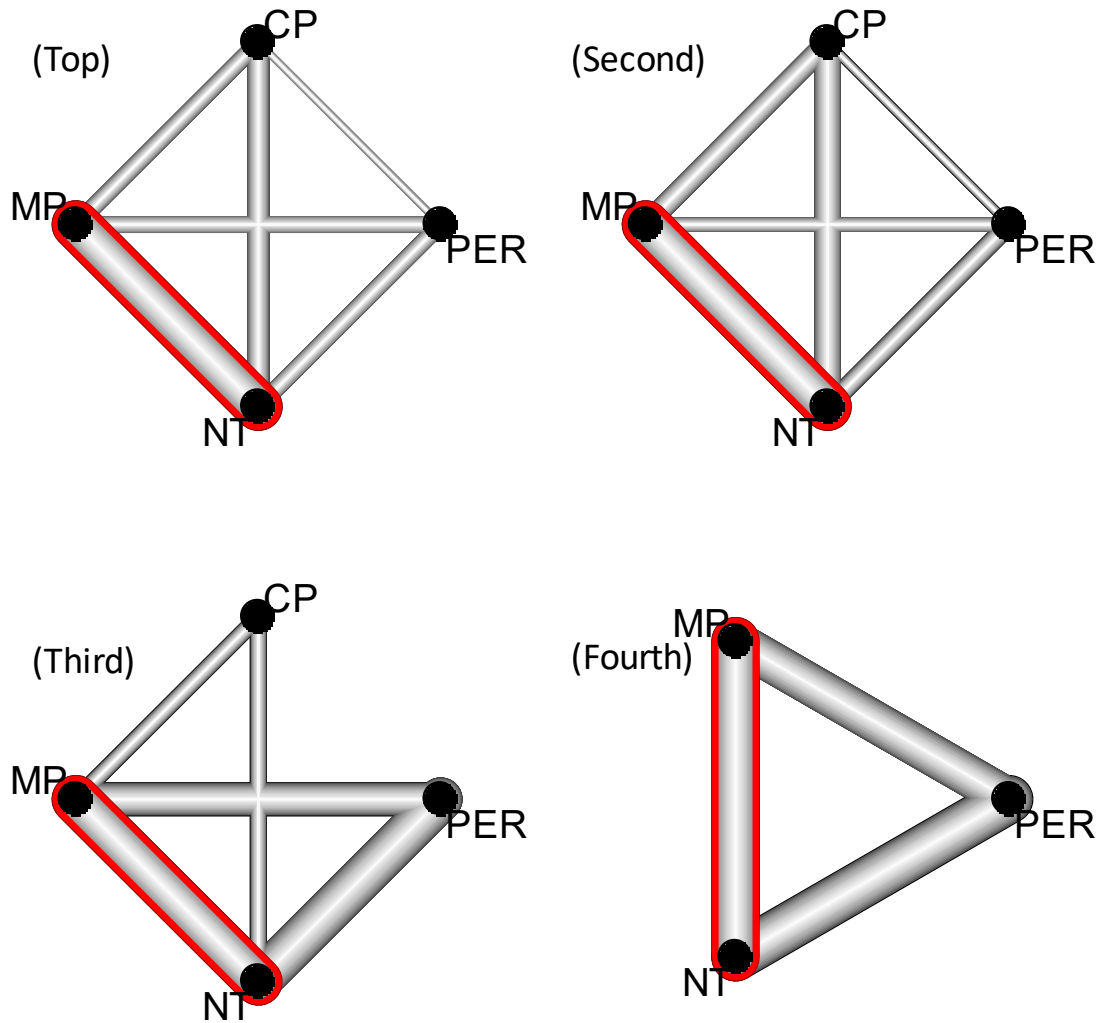

## Supplemental Material 2:

Net heat plot for aggregate stability within the top, second and third soil depths. MP = moldboard plow, CP = chisel plow, NT = no-till, PER = perennial system.

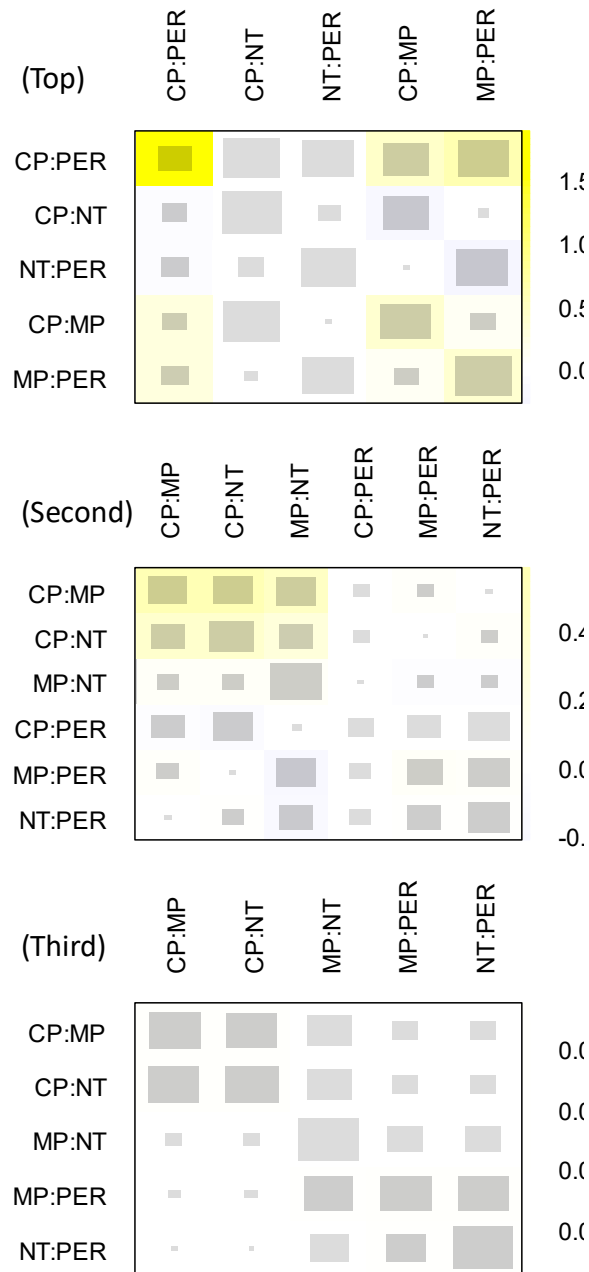

Net Heat Plots is used to detect inconsistency between direct and indirect estimates. The contribution of pooled direct evidence of each single design (shown in column) to each network estimate (shown in row) is represented by the area of the grey squares. The colors of the diagonal represent the intensity of inconsistency of the network, with red squares (hot spots) indicating greater inconsistency and blue squares indicating less inconsistency.

### Supplemental Material 3:

Network graph for bulk density within the top, second, third and fourth soil depths. MP = moldboard plow, CP = chisel plow, NT = no-till, PER = perennial system.

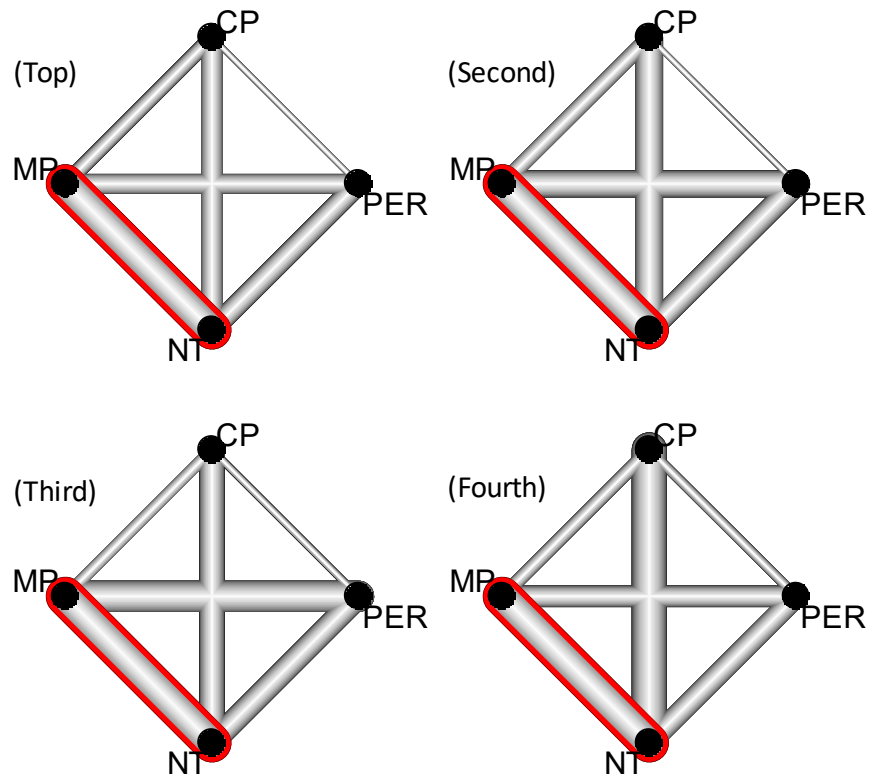

#### Supplemental Material 4:

Net heat plot for bulk density within the top, second, third and fourth depth. MP = moldboard plow, CP = chisel plow, NT = no-till, PER = perennial system.

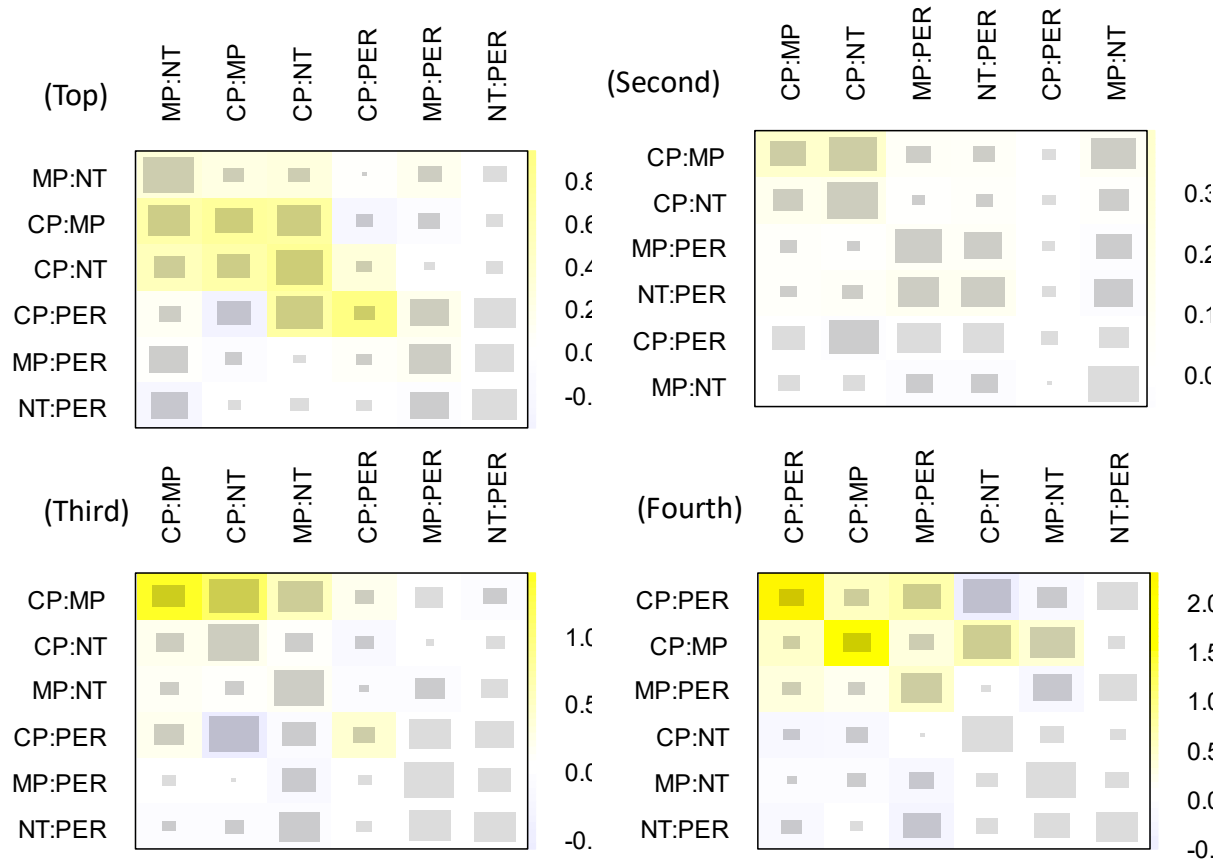

**Supplemental Material 5:**

Network graph for soil penetration resistance within the top, second and third soil depths. MP = moldboard plow, CP = chisel plow, NT = no-till, PER = perennial system.

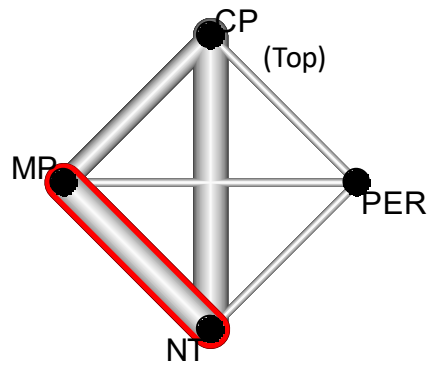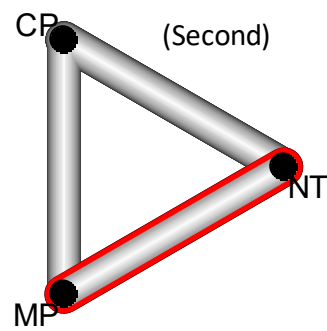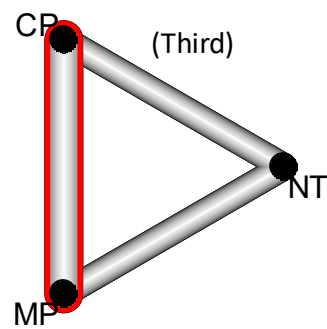

### Supplemental Material 6:

Net heat plot for penetration resistance within the top soil depths. MP = moldboard plow, CP = chisel plow, NT = no-till, PER = perennial system.

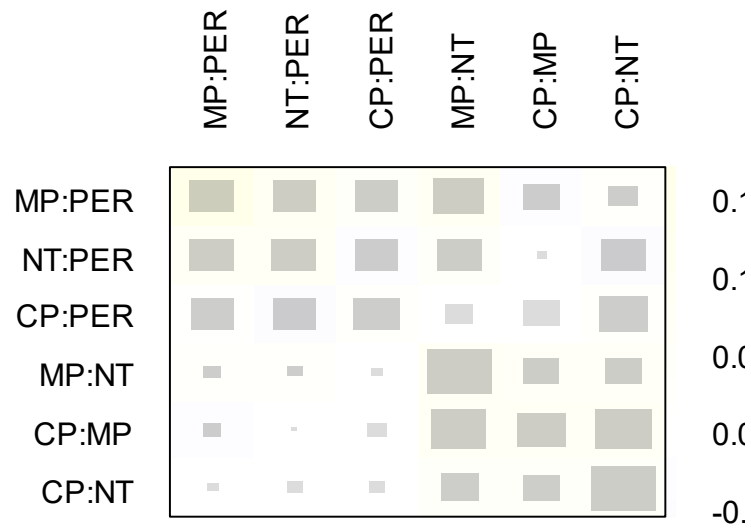

Supplement: s1 [file s1]
